# Supplementary material for: Direct Phenotyping and Principal Component Analysis of Type Traits Implicate Novel QTL in Bovine Mastitis through Genome-Wide Association
Source: MDPI journal article supplement (doi:10.3390/ani11041147), 2021-04-17
Supplement: s1 [file s1]

Supplementary Table S1. QTL positions and candidate genes. Significantly associated QTL (Bonferroni  $< 0.05$ ) with chromosome and base pair position, as well as potential candidate genes for all models are given. The implied role of each locus on the basis of their respective candidate genes, in either udder and teat morphology, mastitis immune responses, or other processes (N/A) is also summarized. Asterisks (\*) indicate novel QTL.

| Trait                        | Chromosome <sup>1</sup> | Position (bp) <sup>1</sup> | Candidate Genes <sup>2</sup>                                                                                                                                                                                      | Implied Role           |
|------------------------------|-------------------------|----------------------------|-------------------------------------------------------------------------------------------------------------------------------------------------------------------------------------------------------------------|------------------------|
| Front Teat Length            | 10                      | 50107685-50117321          | <i>FOXB1, LOC112448464</i>                                                                                                                                                                                        | N/A                    |
| Front Teat Width             | 23                      | 19946762                   | <b>PLA2G7</b> , <i>ANKRD66, TRD6, SLC25A27</i>                                                                                                                                                                    | immunology             |
|                              | 23                      | 20566460-20576922          | <i>TNFRSF21, CD2AP, ADGRF2</i>                                                                                                                                                                                    | morphology; immunology |
| Fore Udder Attachment        | 2                       | 126354670-126359098        | <i>WASF2, GPR3, CD164L2, FCN3, MAP3K6, SYTL1, TMEM222, WDTC1, SLC9A1, FAM46B, TRNP1, KDF1, NUDC, NR0B2, GPN2, SFN, ZDHHC18, PIGV, LOC112443408, ARID1A, RPS6KA1, HMGN2, LIN28A, ZNF683, CRYBG2, UBXN11, CEP85</i> | morphology; immunology |
|                              | X                       | 121461599-121477381        | <i>PHEX, LOC112445297, SMS, LOC112445297, MBTPS2, SMPX, KLHL34, TRNAC-GCA, LOC112445299, CNKSR2</i>                                                                                                               | N/A                    |
| Risk PC1                     | 15*                     | 7287030*                   | <i>CEP126, ANGPTL5, TRPC6</i>                                                                                                                                                                                     | morphology; immunology |
| Rear Teat Length             | 2                       | 112245780                  | <i>SCG2, AP1S3, WDFY1, MRPL44, SERPINE2, FAM124B, CUL3</i>                                                                                                                                                        |                        |
| Rear Teat End Shape          | 26                      | 50630351                   | <b>KNDC1</b> , <i>SYCE1, TCERG1L, CYP2E1, LOC528422, LOC112444506, ADGRA1, LOC100850437, LOC101906198, LOC112444503, CFAP46, LOC112444502, LOC112444507, NKX6-2, INPP5A, LOC112444505</i>                         | morphology; immunology |
| Rear Teat Width <sup>3</sup> | 25*                     | 38568564*                  | <i>LOC618554, LOC101906717</i>                                                                                                                                                                                    | N/A                    |
| Rear Teat Width <sup>4</sup> | 10                      |                            | <b>CTDSPL2</b> , <i>EIF3J, SPG11, LOC112448593, PATL2</i>                                                                                                                                                         | N/A                    |
|                              | 11*                     | 104129366*                 | <i>LOC112448855, LHX3, QSOX2, LOC787891, GPSM1, LOC101902280, DNLZ, CARD9, SNAPC4, ENTR1,</i>                                                                                                                     | morphology; immunology |

|     |                   |                                                                                                                                                                                                                                                                                                                                                                                                                                                         |                        |
|-----|-------------------|---------------------------------------------------------------------------------------------------------------------------------------------------------------------------------------------------------------------------------------------------------------------------------------------------------------------------------------------------------------------------------------------------------------------------------------------------------|------------------------|
|     |                   | PMPCA, INPP5E, SEC16A, NOTCH1, LOC112448856, EGFL7, MIR126, LOC101902839, LOC101902895, FAM69B, LOC112448928, LOC107132967, LOC100848307, LOC112448857, ABO, LOC112448956, SURF6, LOC11244890, MED22, RPL7A, LOC100139115, LOC100112448907, LOC100112448908, LOC100112448904, LOC100112448903, LOC100112448905, SURF2, SURF4, STKLD1, LOC107132968, REXO4, ADAMTS13, CACFD1, SLC2A6, LOC112448858, TRNAC-GCA, MYMK, ADAMTSL2, FAM163B, DBH, SARDH, VAV2 |                        |
| 16  | 61802991-62196774 | CEP350, QSOX1, LOC112441858, LHX4, ACBD6, MIR669, XPR1, TRNAC-ACA, LOC107133256, KIAA1614, STX6, MR1, IER5, CACNA1E, LOC104974498, ZNF648, LOC101905162, GLUL, TEDDM1, RGSL1, RNASEL,                                                                                                                                                                                                                                                                   | morphology; immunology |
| 16* | 63823597*         | RGS16, RGS8, LOC101905664, NPL, DHX9, SHCBP1L, LAMC1, LAMC2, NMNAT2                                                                                                                                                                                                                                                                                                                                                                                     | morphology; immunology |
| 18  | 17655467          | LOC112442233, CBLN1, C18H16orf78, ZNF423, TRNAG-CCC                                                                                                                                                                                                                                                                                                                                                                                                     | N/A                    |
| 18  | 20537778          | LOC516179, TOX3                                                                                                                                                                                                                                                                                                                                                                                                                                         | N/A                    |
| 18  | 42468232          | MIR2899, LOC112442482, TRNAG-CCC, LOC617301, ZNF507, DPY19L3                                                                                                                                                                                                                                                                                                                                                                                            | N/A                    |
| 19  | 22640468          | VPS53, MIR2336, RFLNB, C19H17orf97, TRNAG-UCC, RPH3AL, LOC104975006, DOC2B, LOC112442619, YWHAE, TRNAE-UUC, CRK, MYO1C, <b>INPP5K</b> , PITPNA, SLC43A2, SCARF1, RILP, PRPF8, TLCD2, MIR22, WDR81, SMYD4, SERPINF1, RPA1, RTN4RL1, LOC112442621, DPH1, OVCA1, MIR132, MIR212, HIC1, SMG6, LOC112442776                                                                                                                                                  | morphology; immunology |
| 19  | 23978522-23997890 | RAP1GAP2, OR1D5, LOC101906737, LOC618593, OR1G1, LOC540082, LOC532238, LOC522582, LOC112442765, <b>LOC520835</b> , LOC59525, LOC59526                                                                                                                                                                                                                                                                                                                   | N/A                    |

|                                      |     |                         |                                                                                                                                                                                                                                       |                           |
|--------------------------------------|-----|-------------------------|---------------------------------------------------------------------------------------------------------------------------------------------------------------------------------------------------------------------------------------|---------------------------|
|                                      | 19  | 29058547-<br>29063744   | <i>GLP2R, RCVRN, <b>GAS7</b></i>                                                                                                                                                                                                      | immunology                |
|                                      | 25* | 35208040*               | <i>CUX1, TRNAW-CCA, MIR2388, LOC112444316,<br/>LOC112444338, MYL10, COL26A1, LOC104970468, IFT22,<br/>FIS1, PLOD3, LOC618076, NAT16, VGF, AP1S1,<br/>LOC101902751, SERPINE1, TRIM56, LOC101902689,<br/>LOC101909082, LOC107131854</i> | morphology;<br>immunology |
|                                      | 25  | 40126743-<br>40190566   | <b>SDK1</b>                                                                                                                                                                                                                           | immunology                |
| Udder Depth                          | 5   | 113268242               | <b>TCF20</b> , LOC104976976                                                                                                                                                                                                           | morphology                |
| Udder Height                         | 6   | 102964124-<br>102982437 | <b>LOC100298890</b>                                                                                                                                                                                                                   | N/A                       |
|                                      | 14  | 27024015                | <i>CLVS1, <b>ASPH</b></i>                                                                                                                                                                                                             | morphology                |
|                                      | 15  | 15545765-<br>15782913   | <b>AMOTL1, LOC112441606</b>                                                                                                                                                                                                           | N/A                       |
|                                      | 18  | 62273143-<br>62481417   | <i>TNNT1, PPP1R12C, LOC112442386, LOC112442387,<br/>EPS8L1, <b>RDH13</b>, LOC100848752, GP6, NLRP2,<br/>LOC100336589, LOC100852077, <b>LOC112442414</b></i>                                                                           | morphology;<br>immunology |
|                                      | 22  | 46733454                | <b>CACNA2D3</b> , LOC112443534                                                                                                                                                                                                        | N/A                       |
| Udder Width                          | 15  | 75722222                | <i>PRDM11, LOC101906676, SYT13, LOC107133190,<br/>LOC112441655, CHST1, LOC104974324, LOC107133191,<br/>SLC35C1, CRY2, MAPK8IP1, C15H11orf94, PEX16,<br/>LARGE2, PHF21A, CREB3L1</i>                                                   | morphology;<br>immunology |
| Front Teat<br>Placement <sup>5</sup> | 9   | 58002055-<br>58079933   | <i>LOC101902249, LOC112448054</i>                                                                                                                                                                                                     | N/A                       |
| Udder Depth <sup>5,6</sup>           | 17  | 34476230-<br>34552407   | <i>SPRY1, <b>SPATA5</b>, LOC112442097, NUDT6, FGF2</i>                                                                                                                                                                                | morphology                |

<sup>1</sup>Positions based on ARS\_UCD 1.2

<sup>2</sup>Genes in LD with significantly associated SNP, or +/- 500 kb of associated SNP in case of no LD, bolded text indicates associated SNP is within the gene

<sup>3</sup>case-control GWA of narrow versus wide rear teats divided at the median value

---

<sup>4</sup>linear GWA of quantitative rear teat width scores

<sup>5</sup>primiparous only subset of cows (n = 144)

<sup>6</sup>not passing Bonferroni correction, QTL significantly associated at  $FDR < 0.05$
